# Supplementary material for: Enteric nervous system damage caused by abnormal intestinal butyrate metabolism may lead to functional constipation
Source: Front Microbiol. 2023 May 9;14:1117905. doi: 10.3389/fmicb.2023.1117905 (PMC10203953; doi:10.3389/fmicb.2023.1117905)
Supplement: Supplementary file 4 [file Table_3.xlsx]

## Sheet: Sheet2
Group	ID	Butyric acid	Valeric acid	Acetic acid	Caproic acid
4	200	0.1144	0.0227	0.2322	0.0402
4	202	0.1201	0.038	0.2113	0.0589
4	229	0.2688	0.0603	0.4657	0.0542
4	332	0.0849	0.1427	0.767	0.0539
4	346	0.1271	0.0331	1.0453	0.0478
4	347	0.1646	0.0727	0.6953	0.0376
4	437	0.1115	0.0206	0.5159	0.0536
4	446	0.4519	0.1308	0.5245	0.0593
4	514	0.162	0.0486	0.5285	0.0851
4	549	0.0705	0.0179	0.6981	0.0206
3	11	0.123	0.037	0.3568	0.0328
3	13	0.0771	0.0167	0.5581	0.0317
3	26	0.155	0.0421	0.9434	0.0597
3	32	0.1492	0.0456	0.3509	0.0595
3	60	0.17	0.0246	0.5848	0.0334
3	63	0.1238	0.0335	0.7153	0.0617
3	67	0.132	0.0299	1.0798	0.0311
3	71	0.0579	0.0104	0.9499	0.0283
3	93	0.1074	0.0237	0.2732	0.0359
3	118	0.0964	0.0571	0.3172	0.0283
3	122	0.1641	0.0684	0.6979	0.0551
3	125	0.2802	0.1244	1.8099	0.0678
3	127	0.1991	0.0756	0.8133	0.0492
3	141	0.1137	0.0488	0.5252	0.057
3	158	0.114	0.0418	0.3579	0.0431
3	189	0.279	0.0793	0.3099	0.1529
3	211	0.1556	0.0402	0.3837	0.0286
3	213	0.1304	0.0317	0.2005	0.0641
3	228	0.1953	0.0503	0.6674	0.0747
3	240	0.2892	0.0881	0.4138	0.1018
3	258	0.098	0.0456	0.4072	0.0407
3	265	0.1337	0.0407	0.719	0.0512
3	268	0.1043	0.0345	0.5428	0.0841
3	293	0.1652	0.0522	0.7106	0.0334
3	305	0.0859	0.0429	0.2042	0.0239
3	306	0.1471	0.0385	0.448	0.0503
3	310	0.2319	0.0899	0.8513	0.1067
3	314	0.1827	0.0517	0.918	0.0638
3	318	0.195	0.0589	0.9445	0.0677
3	330	0.1454	0.0628	0.6338	0.0474
3	341	0.0831	0.0244	0.5635	0.0509
3	357	0.1088	0.0242	0.566	0.0455
3	376	0.0821	0.036	0.6741	0.0403
3	402	0.1112	0.0294	0.7217	0.0417
3	405	0.1348	0.0346	1.3257	0.0559
3	411	0.1183	0.0688	0.8439	0.0476
3	418	0.1082	0.0513	0.5585	0.0339
3	420	0.113	0.0484	0.5596	0.0474
3	424	0.1441	0.07	0.8125	0.0591
3	429	0.0946	0.0141	0.3984	0.0413
3	440	0.1332	0.0317	0.4418	0.0492
3	449	0.1641	0.0343	0.5912	0.0538
3	480	0.1183	0.0324	0.514	0.0506
3	505	0.1561	0.0583	1.0613	0.0694
3	539	0.1649	0.0354	1.0919	0.1146
3	561	0.1327	0.0382	2.1522	0.0379
3	562	0.0964	0.0285	0.6529	0.048
3	570	0.0792	0.0221	0.7006	0.0543
3	571	0.0878	0.0672	0.9836	0.0335
3	582	0.0784	0.034	0.8605	0.0326
3	591	0.0786	0.031	0.5413	0.0331
3	593	0.1032	0.016	1.0229	0.0446
2	2	0.174	0.0689	1.549	0.0521
2	3	0.1092	0.0681	0.6846	0.0649
2	4	0.0945	0.0352	0.2146	0.0414
2	5	0.1478	0.0615	0.9451	0.0366
2	7	0.0819	0.0237	0.5063	0.0389
2	9	0.2047	0.0616	0.4791	0.0831
2	10	0.1121	0.0542	0.6962	0.0512
2	12	0.1074	0.0862	0.8691	0.0445
2	14	0.1165	0.0717	1.1005	0.0382
2	15	0.0943	0.0385	0.3198	0.0397
2	16	0.1503	0.1149	1.1906	0.05
2	17	0.1016	0.0418	0.4814	0.0471
2	18	0.1107	0.0527	0.5725	0.0315
2	19	0.131	0.0392	0.9592	0.0476
2	20	0.0994	0.0462	0.4569	0.0611
2	22	0.2077	0.046	1.9424	0.049
2	23	0.1052	0.0361	0.602	0.0459
2	25	0.124	0.0514	0.3338	0.0489
2	27	0.2501	0.1395	0.5664	0.0471
2	29	0.1472	0.0441	0.3646	0.0468
2	30	0.1085	0.0266	0.367	0.0494
2	31	0.1078	0.031	0.4224	0.047
2	35	0.2137	0.0442	0.9701	0.045
2	37	0.1607	0.0454	2.5374	0.0438
2	39	0.1699	0.1346	1.0476	0.0799
2	40	0.1548	0.0413	0.4594	0.0592
2	44	0.1296	0.0496	0.6079	0.0486
2	46	0.1053	0.0329	0.4456	0.053
2	47	0.2306	0.0414	1.2353	0.033
2	48	0.1919	0.0433	0.3993	0.0967
2	49	0.1462	0.0455	0.3864	0.041
2	50	0.1188	0.0358	0.4055	0.0586
2	52	0.085	0.0399	0.5026	0.0384
2	53	0.1456	0.0251	0.3142	0.0249
2	56	0.0982	0.0485	0.7892	0.0511
2	58	0.1089	0.0235	0.5101	0.0487
2	62	0.1557	0.0716	0.9916	0.0998
2	64	0.0837	0.0175	0.5166	0.0611
2	65	0.0754	0.0196	0.9214	0.0361
2	66	0.0835	0.0267	0.4886	0.0245
2	68	0.278	0.059	0.3727	0.0642
2	69	0.1761	0.0621	1.0829	0.0414
2	72	0.1227	0.0806	0.7671	0.0643
2	74	0.129	0.0363	0.5331	0.0698
2	76	0.0966	0.0379	0.6839	0.0618
2	77	0.079	0.065	0.499	0.036
2	78	0.1083	0.0424	1.1773	0.0331
2	79	0.1446	0.046	0.6985	0.0543
2	80	0.1099	0.0673	0.5151	0.059
2	84	0.1079	0.0366	0.3304	0.041
2	85	0.1145	0.0778	0.3472	0.0424
2	86	0.0849	0.0291	0.8189	0.0397
2	88	0.1215	0.0371	0.4392	0.0367
2	89	0.0774	0.04	0.5571	0.0546
2	92	0.2163	0.1075	1.0684	0.0417
2	95	0.0911	0.0582	0.2708	0.0418
2	97	0.135	0.0546	1.3441	0.0529
2	98	0.0965	0.0439	0.5696	0.0461
2	99	0.1794	0.1151	0.4443	0.0567
2	101	0.1154	0.0396	0.5566	0.0514
2	102	0.1822	0.0424	0.4367	0.0499
2	103	0.203	0.0412	0.625	0.0479
2	104	0.2028	0.053	0.592	0.0675
2	105	0.1246	0.0321	0.8468	0.0557
2	106	0.1094	0.0361	0.5223	0.0302
2	107	0.1811	0.0354	0.3326	0.0498
2	108	0.1454	0.0392	0.6127	0.068
2	109	0.1241	0.0635	0.4169	0.0531
2	110	0.135	0.0564	0.4467	0.0472
2	111	0.1283	0.0237	0.429	0.0597
2	112	0.1052	0.0319	0.4027	0.0461
2	113	0.1034	0.0597	0.2463	0.0508
2	114	0.1039	0.034	0.3435	0.0458
2	115	0.1104	0.0716	0.4696	0.0528
2	119	0.1668	0.0303	0.3139	0.0388
2	120	0.0833	0.0237	0.3104	0.0331
2	121	0.1111	0.066	0.4429	0.0512
2	123	0.0955	0.0465	0.5176	0.0491
2	124	0.169	0.0347	0.7099	0.0463
2	126	0.154	0.0468	0.3689	0.0614
2	128	0.0756	0.0278	0.1898	0.0297
2	129	0.1663	0.0295	0.3421	0.0378
2	130	0.1134	0.0214	0.4656	0.0633
2	132	0.1011	0.038	0.3403	0.0322
2	137	0.1216	0.0331	0.5965	0.0513
2	138	0.1153	0.0566	0.4846	0.0347
2	139	0.1124	0.0658	0.4685	0.0446
2	140	0.11	0.0296	0.5282	0.0539
2	143	0.1113	0.0725	0.2937	0.0419
2	144	0.1031	0.0655	0.365	0.0367
2	145	0.1325	0.0325	0.2298	0.0331
2	146	0.0752	0.0346	0.5655	0.0362
2	148	0.1249	0.0421	0.7956	0.038
2	149	0.1497	0.0416	0.7969	0.0684
2	150	0.1136	0.0255	0.4612	0.0424
2	151	0.1845	0.0425	0.4176	0.0389
2	153	0.0836	0.0428	0.4131	0.0231
2	154	0.1018	0.1021	0.4205	0.0451
2	155	0.0825	0.0273	0.3648	0.0387
2	156	0.1277	0.0437	0.6224	0.0541
2	157	0.1132	0.0416	0.5728	0.0414
2	159	0.1057	0.0365	0.4157	0.0631
2	160	0.1525	0.0406	0.8227	0.049
2	161	0.1206	0.0305	0.5852	0.048
2	162	0.0771	0.0397	0.4012	0.0303
2	163	0.1048	0.0462	0.4778	0.0601
2	166	0.1517	0.0675	0.5529	0.0597
2	167	0.0973	0.0356	0.4879	0.0357
2	168	0.1394	0.0487	0.6056	0.0562
2	170	0.1069	0.033	0.5449	0.0433
2	172	0.1155	0.0459	0.44	0.0502
2	175	0.1774	0.041	0.3646	0.0657
2	177	0.0893	0.0371	0.2247	0.0358
2	178	0.1269	0.0313	0.3267	0.0462
2	179	0.1055	0.0381	0.2472	0.0237
2	180	0.1171	0.0334	0.3099	0.0403
2	181	0.1081	0.0287	0.2036	0.0308
2	182	0.1244	0.0417	0.4372	0.0346
2	183	0.1126	0.0556	0.1917	0.0327
2	185	0.2009	0.0552	0.3041	0.057
2	187	0.1213	0.0731	0.2249	0.0522
2	188	0.0806	0.0271	0.1677	0.0287
2	191	0.0797	0.0287	0.531	0.0344
2	193	0.1218	0.0248	0.1206	0.0392
2	194	0.1566	0.0426	0.5315	0.0564
2	195	0.1065	0.0387	0.2736	0.0515
2	196	0.0696	0.0223	0.1129	0.0546
2	199	0.115	0.0265	0.2139	0.0334
2	205	0.1373	0.0347	0.5291	0.0408
2	207	0.127	0.0303	0.2047	0.0578
2	208	0.1388	0.0464	0.22	0.0553
2	209	0.1098	0.0247	0.287	0.0429
2	210	0.1625	0.0615	0.2384	0.0457
2	214	0.0999	0.0277	0.125	0.0516
2	215	0.1491	0.0406	0.1924	0.0392
2	217	0.0836	0.0316	0.6763	0.039
2	218	0.098	0.0258	0.1413	0.0423
2	219	0.1323	0.0337	0.1705	0.0427
2	220	0.118	0.0448	0.1888	0.0338
2	223	0.145	0.0354	1.1788	0.0585
2	225	0.1055	0.0303	0.4474	0.0349
2	226	0.1069	0.0534	0.3749	0.0426
2	230	0.1299	0.0299	0.4154	0.0484
2	231	0.1643	0.0351	0.536	0.059
2	232	0.1172	0.038	0.8056	0.0405
2	235	0.1455	0.0299	0.4661	0.0405
2	236	0.1712	0.0505	0.4509	0.0825
2	237	0.1676	0.0412	0.7813	0.0896
2	239	0.1982	0.0862	1.3747	0.0598
2	241	0.1263	0.0312	0.6328	0.0551
2	242	0.1204	0.0227	0.5212	0.0551
2	246	0.2693	0.0515	0.596	0.1019
2	247	0.132	0.08	0.8488	0.0909
2	248	0.0672	0.0561	0.2146	0.0473
2	249	0.1718	0.0333	0.7483	0.0601
2	251	0.1084	0.04	0.5334	0.0686
2	252	0.1544	0.0327	0.6113	0.0872
2	253	0.1083	0.0311	0.4224	0.0512
2	254	0.1205	0.0401	0.3715	0.0379
2	255	0.1198	0.0437	0.85	0.0496
2	257	0.0925	0.0261	0.4444	0.0639
2	260	0.1163	0.05	0.5265	0.0606
2	261	0.1136	0.0247	0.4098	0.0393
2	262	0.0875	0.0285	0.5917	0.0394
2	264	0.0884	0.0333	0.6703	0.0421
2	266	0.1541	0.0382	0.6495	0.0585
2	267	0.0875	0.0458	0.3462	0.0352
2	269	0.1047	0.0395	0.4449	0.0527
2	270	0.234	0.1173	0.882	0.0578
2	271	0.1193	0.0383	0.3692	0.0418
2	272	0.0962	0.0339	0.4624	0.0519
2	273	0.0965	0.0202	0.3989	0.0343
2	275	0.1466	0.047	1.2214	0.0558
2	277	0.1118	0.0434	0.6223	0.0507
2	278	0.111	0.0361	0.7251	0.0669
2	279	0.1157	0.0478	0.5313	0.0598
2	280	0.1409	0.0292	0.6111	0.0862
2	281	0.0987	0.0285	1.1856	0.0414
2	283	0.1389	0.0408	0.4352	0.1075
2	286	0.092	0.0222	0.4504	0.0442
2	288	0.1043	0.0438	0.3455	0.0708
2	297	0.1161	0.0466	0.2766	0.0515
2	300	0.0997	0.0519	1.1433	0.0277
2	301	0.0916	0.0192	0.2237	0.0556
2	302	0.1463	0.0713	0.6639	0.0338
2	303	0.0977	0.0279	0.408	0.0233
2	304	0.1229	0.0403	0.393	0.0426
2	307	0.1696	0.052	0.402	0.0443
2	311	0.1313	0.0455	0.7609	0.0708
2	313	0.1952	0.0764	0.9022	0.0647
2	317	0.0687	0.0369	0.3373	0.0213
2	320	0.0869	0.0304	0.7903	0.0276
2	321	0.1822	0.0848	0.4125	0.0801
2	324	0.2012	0.0292	0.6544	0.0493
2	325	0.1086	0.0273	0.4448	0.0294
2	326	0.12	0.0242	0.4203	0.0423
2	327	0.1041	0.0254	0.3504	0.0424
2	328	0.0895	0.0357	0.6614	0.0295
2	331	0.0937	0.024	1.0008	0.0455
2	334	0.1025	0.0224	0.4675	0.0363
2	337	0.0903	0.0473	0.557	0.04
2	338	0.1186	0.0473	2.1635	0.0374
2	345	0.1027	0.0251	0.5715	0.0675
2	348	0.0979	0.0325	0.597	0.071
2	350	0.0847	0.0256	0.9756	0.0506
2	351	0.1431	0.0447	1.2117	0.0446
2	358	0.0954	0.0231	0.642	0.0508
2	359	0.1054	0.0595	0.5527	0.0495
2	360	0.1093	0.0669	0.5197	0.0605
2	361	0.0927	0.0425	0.4503	0.0555
2	362	0.1057	0.0268	0.6353	0.0787
2	363	0.1152	0.0395	0.7088	0.0663
2	364	0.1146	0.0781	0.7393	0.0774
2	365	0.1196	0.0423	0.4789	0.0639
2	366	0.0894	0.0336	0.6171	0.0424
2	368	0.1376	0.0304	1.0139	0.0536
2	371	0.1178	0.0316	0.6556	0.0541
2	372	0.1027	0.0349	0.6197	0.0475
2	374	0.11	0.0275	0.6502	0.044
2	377	0.2136	0.086	0.9414	0.0482
2	378	0.2397	0.0579	1.4775	0.0454
2	379	0.126	0.0501	0.7148	0.0579
2	380	0.0867	0.0186	0.633	0.0359
2	383	0.1307	0.0625	1.1894	0.0551
2	385	0.1413	0.0498	0.5728	0.036
2	386	0.1202	0.0562	0.7367	0.0555
2	387	0.1032	0.0321	0.5217	0.0691
2	388	0.1119	0.0208	0.5582	0.0391
2	389	0.1102	0.0306	0.6105	0.0556
2	391	0.1685	0.0624	0.8771	0.0513
2	393	0.1099	0.0426	0.5884	0.0392
2	394	0.1644	0.109	0.9976	0.0356
2	395	0.1025	0.0224	0.7092	0.0502
2	396	0.1407	0.0463	1.3991	0.0363
2	397	0.1217	0.0291	0.9908	0.0347
2	399	0.1311	0.0264	0.6665	0.0786
2	400	0.1364	0.0326	0.8254	0.0437
2	403	0.1153	0.0538	0.6853	0.0496
2	404	0.2166	0.0369	1.1395	0.0664
2	406	0.2026	0.0443	1.1148	0.0397
2	407	0.1084	0.02	0.8798	0.0361
2	408	0.1201	0.0433	0.5095	0.0723
2	410	0.2246	0.0747	1.7903	0.0441
2	412	0.1085	0.0211	0.5624	0.0373
2	413	0.1121	0.0279	0.7487	0.0314
2	414	0.1294	0.0294	0.6275	0.0506
2	415	0.1376	0.0312	0.6794	0.0412
2	417	0.1123	0.0367	0.7706	0.0349
2	419	0.1452	0.0706	0.4237	0.0676
2	421	0.1379	0.0405	0.3899	0.0753
2	422	0.149	0.0365	0.4863	0.1085
2	423	0.1171	0.0406	0.4691	0.0589
2	425	0.1697	0.0623	0.533	0.0978
2	427	0.0986	0.0336	0.3059	0.0572
2	428	0.1221	0.0422	0.79	0.0526
2	430	0.1286	0.038	0.5062	0.0493
2	438	0.1133	0.0251	0.5342	0.065
2	441	0.1221	0.0305	0.3425	0.0553
2	442	0.1602	0.0257	0.5158	0.0726
2	443	0.1885	0.0758	1.0809	0.0703
2	444	0.1188	0.0402	0.4246	0.0546
2	445	0.1324	0.0369	0.5565	0.0488
2	447	0.1019	0.0317	0.313	0.0461
2	448	0.1052	0.0256	0.3551	0.0534
2	450	0.0999	0.0322	0.259	0.0362
2	452	0.1061	0.024	0.2455	0.0468
2	453	0.1076	0.0192	0.361	0.0528
2	455	0.1016	0.0198	0.3827	0.0419
2	456	0.1191	0.0336	0.5027	0.0568
2	457	0.1085	0.0191	0.2396	0.0517
2	458	0.1189	0.0302	0.3635	0.0551
2	460	0.1745	0.0828	0.5132	0.1127
2	461	0.1025	0.0226	0.2928	0.0358
2	462	0.0984	0.0183	0.2082	0.0391
2	464	0.1168	0.0601	0.0936	0.0488
2	465	0.0972	0.0323	0.347	0.0331
2	466	0.0898	0.0358	0.0931	0.0356
2	467	0.0999	0.0179	0.118	0.0497
2	468	0.1141	0.0389	0.6809	0.0785
2	469	0.1245	0.0267	0.1449	0.0619
2	470	0.101	0.0468	0.3728	0.055
2	471	0.0908	0.0207	0.2288	0.0408
2	473	0.1196	0.028	0.2508	0.0555
2	474	0.1071	0.0364	0.6167	0.0512
2	475	0.1587	0.0553	0.5199	0.0637
2	477	0.0899	0.0281	0.4672	0.0271
2	478	0.1056	0.0294	0.2914	0.0455
2	481	0.141	0.033	0.3266	0.0927
2	482	0.0999	0.0412	0.529	0.0443
2	483	0.0802	0.0188	0.3656	0.0276
2	484	0.085	0.0315	0.7049	0.0376
2	487	0.0826	0.0252	0.7047	0.0466
2	489	0.0987	0.023	0.7973	0.0313
2	490	0.0935	0.0226	0.7505	0.0472
2	496	0.0888	0.0259	1.0065	0.0516
2	497	0.0971	0.0376	0.5669	0.0492
2	498	0.0984	0.0333	0.6781	0.039
2	500	0.0754	0.0293	0.6598	0.0537
2	501	0.0822	0.0373	0.6981	0.0494
2	502	0.0967	0.0278	0.7172	0.0371
2	503	0.1187	0.0252	1.1692	0.0532
2	504	0.0902	0.0514	1.2518	0.0475
2	506	0.1257	0.0269	1.1918	0.0497
2	507	0.2237	0.0715	0.9761	0.1092
2	508	0.1216	0.0605	0.6617	0.0682
2	510	0.1265	0.0186	1.1607	0.0429
2	512	0.1209	0.0449	1.7363	0.0512
2	513	0.0886	0.0417	1.1656	0.0513
2	515	0.1362	0.0501	1.2009	0.0678
2	517	0.1123	0.0331	0.7179	0.0514
2	518	0.0997	0.0251	0.535	0.0706
2	519	0.1513	0.0346	0.8259	0.085
2	520	0.098	0.0279	0.7755	0.0514
2	522	0.171	0.0439	1.2018	0.0551
2	524	0.1194	0.0298	1.059	0.0546
2	526	0.1817	0.0542	1.3857	0.0751
2	527	0.119	0.046	0.5037	0.0664
2	528	0.1447	0.0965	2.0418	0.0686
2	529	0.1933	0.0885	1.2719	0.0698
2	530	0.1653	0.0662	2.2497	0.0903
2	531	0.1229	0.0642	1.1613	0.0711
2	532	0.0774	0.0287	0.9922	0.0571
2	534	0.1843	0.0492	1.3186	0.0843
2	535	0.1059	0.0262	0.6871	0.0627
2	536	0.1071	0.0572	0.9928	0.0551
2	537	0.0976	0.0411	0.7699	0.0464
2	538	0.0749	0.0228	0.6098	0.0597
2	541	0.1319	0.0328	0.6263	0.027
2	542	0.0697	0.012	0.6135	0.0396
2	544	0.0727	0.0178	0.7578	0.0468
2	545	0.115	0.0611	1.1819	0.0369
2	546	0.0774	0.0119	0.493	0.0295
2	548	0.0884	0.0174	0.7619	0.0517
2	550	0.1193	0.0229	0.6299	0.0575
2	551	0.0786	0.0195	0.4914	0.0724
2	552	0.0684	0.0096	0.4896	0.0532
2	553	0.0769	0.019	0.8845	0.0343
2	556	0.07	0.0275	0.4796	0.0409
2	557	0.0999	0.0251	0.6131	0.0368
2	558	0.0817	0.0351	0.4388	0.033
2	559	0.0715	0.0249	0.6255	0.034
2	560	0.1202	0.0227	0.6505	0.084
2	564	0.0867	0.0169	0.6099	0.0445
2	566	0.0726	0.0155	0.5986	0.0382
2	567	0.0889	0.015	0.475	0.066
2	572	0.0738	0.0084	0.5747	0.0321
2	573	0.0805	0.0184	0.6856	0.0432
2	574	0.1282	0.0525	0.6743	0.0434
2	575	0.0965	0.0341	0.6966	0.0453
2	576	0.1122	0.0386	1.3361	0.0479
2	577	0.0917	0.0377	0.7669	0.0553
2	578	0.0713	0.024	0.7027	0.0498
2	579	0.0899	0.0279	0.7438	0.0601
2	580	0.1126	0.0519	0.6768	0.0512
2	585	0.0651	0.02	0.6436	0.0443
2	586	0.1033	0.0369	0.6219	0.0658
2	587	0.0892	0.0224	0.6395	0.073
2	588	0.0902	0.0321	0.7941	0.0599
2	590	0.0713	0.0176	0.5925	0.0346
2	595	0.0986	0.0157	0.533	0.0536
1	1	0.1074	0.055	0.4121	0.0452
1	43	0.0996	0.104	0.4797	0.0363
1	45	0.0956	0.0373	0.3231	0.0434
1	73	0.106	0.0239	0.3099	0.0312
1	117	0.1135	0.0649	0.5285	0.055
1	174	0.0972	0.0324	0.6091	0.0388
1	203	0.1052	0.0388	0.1507	0.0251
1	204	0.0714	0.0224	0.1526	0.0172
1	233	0.1585	0.045	0.4129	0.0599
1	322	0.0837	0.0214	0.2541	0.034
1	339	0.0737	0.0349	0.3218	0.0333
1	352	0.1378	0.0552	0.5055	0.0486
1	355	0.1183	0.0204	0.8693	0.0555
1	367	0.0854	0.0197	0.4232	0.0384
1	373	0.1218	0.037	0.6813	0.056
1	431	0.1118	0.0342	0.2848	0.0511
1	432	0.1467	0.0788	0.4552	0.0513
1	433	0.1144	0.041	0.2682	0.0464
1	435	0.0971	0.0722	0.2836	0.0426
1	439	0.1167	0.0328	0.3856	0.0585
1	459	0.1087	0.0406	0.6181	0.0365
1	463	0.1097	0.0416	0.2247	0.0524
1	472	0.0803	0.0226	0.4518	0.0398
1	476	0.1211	0.049	0.5307	0.0434
1	491	0.1154	0.0223	0.3436	0.0439
1	492	0.1105	0.0417	1.1531	0.0368
1	495	0.0738	0.0423	0.7013	0.0631
1	509	0.1434	0.1164	1.1718	0.0692
1	511	0.1119	0.0387	1.0093	0.0561
1	540	0.0939	0.0166	1.1672	0.0398
1	554	0.08	0.0143	0.4714	0.0406
1	555	0.1246	0.0275	0.9683	0.0678
1	563	0.0953	0.0138	0.4786	0.0302
1	568	0.0726	0.0201	0.4941	0.0378
1	569	0.081	0.0253	0.9568	0.0413
1	581	0.1885	0.0474	1.6932	0.0647
1	592	0.0892	0.0166	0.7818	0.0436
1	594	0.0738	0.0205	0.8563	0.0324
HC	OTU1	0.0163	0.0109	0.54	0.0336
HC	OTU2	0.0134	0.0104	0.414	0.0351
HC	OTU3	0.0193	0.0118	0.507	0.0272
HC	OTU4	0.0214	0.0109	0.564	0.0263
HC	OTU5	0.0206	0.0132	0.447	0.0333
HC	OTU6	0.0144	0.01	0.582	0.0289
FC	OTU7	0.0344	0.0103	0.426	0.0321
FC	OTU8	0.0278	0.0119	0.507	0.0342
FC	OTU9	0.09	0.0321	0.531	0.0405
FC	OTU10	0.0217	0.0133	0.723	0.0339
FC	OTU11	0.0477	0.0107	0.801	0.027
FC	OTU12	0.0312	0.0139	0.834	0.0447

## Sheet: Sheet1
				Butyricacid
				Valericacid
				Aceticacid
				Caproicacid
